1 **Differences in Gut Microbiota Assembly Alter Its Ability to Metabolize Dietary**  
2 **Polysaccharides and Resist *Clostridioides difficile* Colonization**

3

4 Matthew K. Schnizlein<sup>a</sup>, Alexandra K. Standke<sup>b</sup>, Mark J. Garmo<sup>a</sup>, Summer J. Edwards<sup>b</sup>,  
5 Vincent B. Young<sup>a,b,#</sup>

6

7

8 <sup>a</sup>Department of Microbiology and Immunology, University of Michigan, Ann Arbor, MI,  
9 USA

10 <sup>b</sup>Department of Internal Medicine, University of Michigan, Ann Arbor, MI, USA

11

12 Corresponding author: Vincent B. Young, [youngvi@umich.edu](mailto:youngvi@umich.edu)

13

14 **Abstract:** The mammalian gut is home to a vibrant community of microbes. As the gut  
15 microbiota has evolved, its members have formed a complex yet stable relationships that  
16 prevent non-indigenous microorganisms, such as *Clostridioides difficile*, from establishing  
17 within the gut. Using a bioreactor model of the gut, we characterize how variation in  
18 microbial community assembly changes its ability to resist *C. difficile*. We established  
19 diluted microbial communities from healthy human stool in a bioreactor gut model and  
20 subsequently challenged them with vegetative *C. difficile*. 16S rRNA-gene sequencing  
21 and selective plating revealed that dilution progressively increases microbiota variability  
22 and decreases *C. difficile* colonization resistance. Using Dirichlet Multinomial Mixtures  
23 and linear discriminant analysis of effect size, we identified 19 bacterial taxa, including  
24 *Bifidobacterium*, *Bacteroides* and Lachnospiraceae, that associate with more resistant  
25 community types. Since these taxa are associated with butyrate production, which is tied  
26 to *C. difficile* colonization resistance, we performed another reactor experiment where we  
27 increased inulin concentrations prior to *C. difficile* challenge. Diluted communities  
28 concurrently lost their ability to produce additional butyrate in response to inulin, as

29 measured by high performance liquid chromatography, and resist *C. difficile* colonization.  
30 These data demonstrate that a similar level of microbiota cohesiveness is required to  
31 prevent *C. difficile* colonization and metabolize inulin. It also suggests that metabolic  
32 activity of butyrate-producing microbes is tied to colonization resistance. Future work can  
33 leverage these findings to develop treatments that leverage knowledge of these  
34 ecological dynamics to improve efficacy.

35  
36 **Importance:** The microbes living in the human large intestine helps create an  
37 environment that is resistant to organisms that do not normally reside there, such as the  
38 pathogen *Clostridioides difficile*. Differences in ways in which microbial communities  
39 make an environment their home can change their ability to provide that resistance. To  
40 study those differences, we use a model of the intestine that incorporates only microbial  
41 variables (i.e. no host is involved). By diluting microbial communities to decrease their  
42 complexity, we show that communities lose their ability to resist *C. difficile* at a particular  
43 point and, at the same time, their ability to use inulin, a common dietary fiber, in ways that  
44 make the environment more toxic to *C. difficile*. These findings will help future researchers  
45 dissect the microbial components that create a resistant intestinal environment.

46

47

## 48 1. Introduction

49 The mammalian gut contains a complex ecosystem with a variety of fungal,  
50 bacterial, archaeal and viral organisms that exist in a network of metabolic interactions.  
51 These vast arrays of interactions regulate microbial competition and impact the host.  
52 External stability, otherwise known as colonization resistance, is a complex phenomenon  
53 in which resident taxa prevent the invasion of foreign ones by occupying niches in an  
54 environment. For example, probiotic organisms fail to exist long-term in the gut because  
55 resident microbes are better able to compete for niche space (1). These interactions have  
56 also been observed to prevent colonization of pathogenic organisms such as *Escherichia*  
57 *coli*, *Salmonella* Typhimurium, and *Clostridioides difficile* (2-5).

58 In studying colonization resistance, several models, including humans, mice,  
59 enteroids and bioreactors, have been used to ascertain characteristics of a resistant  
60 environment (5-13). Each of these models supports a unique level of complexity that may  
61 consider host-microbe, microbe-microbe, and microbe-environment interactions.  
62 Bioreactors have been used extensively to study the microbiota of the gut environment,  
63 particularly the dynamics of microbe-mediated colonization resistance. This is due in part  
64 to the controlled way nutrients flow in and out of the system. In the context of resistance  
65 to *C. difficile*, healthy human stool established in these reactors prevents or limits  
66 colonization (14, 15). However, alterations to the resident microbiota can reduce the  
67 ecosystem's ability to do so (15-17).

68 Since much of colonization resistance revolves around microbial metabolism, host  
69 dietary inputs play an important role in modulating this phenotype. As previous studies  
70 have demonstrated, both macronutrients (e.g., proteins and polysaccharides) and

71 cofactors (e.g., vitamins and minerals) can modulate *C. difficile* colonization resistance  
72 by affecting the resident microbiota and host immune system (18-20). Much like  
73 “macroorganisms” adapt to the food available to them, microbes alter their metabolism to  
74 capitalize on the nutrient sources in their surroundings. These metabolic shifts lead to  
75 different downstream products with which other organisms in the ecosystem interact.

76 While previous work has characterized forced effects (e.g., antibiotic use) on  
77 microbiota post-establishment, limited work has characterized the stochastic processes  
78 of community establishment in the context of *C. difficile* colonization resistance (14, 21,  
79 22). To manipulate the microbiota to treat infections, a fuller grasp of the ecological rules  
80 underlying community physiology is needed. Specifically, further work is required to  
81 accurately describe how random and specific effects alter community establishment and  
82 ability to resist the colonization of non-indigenous microbes. Here we describe how  
83 stochastic effects, as induced by community dilution, and directed effects, as induced by  
84 supplementation with additional carbohydrates, influence the establishment of a microbial  
85 community. We also characterize how the functional effects of this variation alter  
86 metabolic output and colonization resistance to *Clostridioides difficile*.

87

## 88 **2. Results**

### 89 **2.1. Dilution of starting inoculum alters establishment dynamics of continuous flow** 90 **cultures**

91 Using a bioreactor system initially developed by Auchtung et al., we extended  
92 studies on how dilution impacts the membership and variability of microbial communities  
93 (14, 22). We established communities in bioreactors from serially diluted stool samples

94 taken from a healthy human donor ( $10^{-3}$ , N=4;  $10^{-5}$ ,  $10^{-7}$ , and  $10^{-9}$ , N=6). Following  
95 inoculation of the reactors, communities were given one day to equilibrate in static culture  
96 before initiating continuous flow. The subsequent 6 days in continuous flow allowed  
97 communities time to adjust before testing their external stability with a model invasive  
98 bacterium, *C. difficile* (Fig. 1A).

99 Dilution increased the variability of communities and lowered the number of taxa  
100 that became established. By day 6, 16S rRNA-gene sequencing analysis showed that  
101  $93 \pm 6$  and  $60 \pm 15$  operational taxonomic units (OTUs) became established in those  
102 communities diluted  $10^{-3}$  and  $10^{-5}$ , respectively (Fig. 1B & Fig. S1A). Communities from  
103 these stool dilutions consisted mainly of Bacteroidota and Bacillota (Fig. 1D-E). Reactors  
104 established with more diluted fecal inocula had fewer OTUs established by day 6 (i.e.,  $10^{-7}$   
105 and  $10^{-9}$  dilutions had  $45 \pm 20$  and  $40 \pm 23$  OTUs, respectively) and also unique  
106 proportions of bacterial phyla, with some being dominated by Actinomycetota and others  
107 by Pseudomonadota (Fig. 1B & Fig. 1F-G). More diluted inocula established in  
108 individualized community structures in each reactor replicate (Fig. S1C-F).

109 This variability is captured by principal coordinate analysis, which shows that  
110 dilution altered the dynamics of each community's establishment so that they cluster  
111 separately (Fig. 1C). Dissimilarity between replicate reactors in each group increased as  
112 the dilution factor increased, as measured by Bray-Curtis and Jaccard Dissimilarity  
113 Indexes, which capture the abundance and the presence/absence of taxa, respectively  
114 (Fig. 2A-B). This variability trend was also observed when comparing multiple timepoints  
115 within each individual reactor (Fig. S2A-B). While dilution greatly reduced the initial  
116 biomass of microbes, after 6 days of growing in continuous culture, communities had

117 reached similar levels of abundance as measured by qPCR of the 16S rRNA-gene (Fig.  
118 S1B).

119

## 120 **2.2. Dilution decreases resistance to a model invasive organism**

121 *C. difficile* is a model organism that can generally not invade communities unless  
122 they have been perturbed. Since dilution increased community variability, which is a  
123 marker of external stability, we hypothesized that this would result in reduced ability to  
124 prevent *C. difficile* colonization. 7 days after establishment of bioreactor communities,  
125 they were challenged with  $10^4$  vegetative *C. difficile* cells. As measured by colony-forming  
126 units (CFU), communities possessed varying capabilities to resist colonization with *C.*  
127 *difficile* (Fig. 3A). Within 24 hrs of challenge, 3 of 4 communities diluted  $10^{-3}$  prevented *C.*  
128 *difficile* colonization while communities diluted  $10^{-9}$  showed colonization levels around  $10^7$   
129 CFU/mL in all six replicates. The largest intra-group variation in colonization was  
130 observed in the  $10^{-5}$ , where all six reactors had intermediate levels of colonization, and  
131  $10^{-7}$  dilutions, which had three reactors colonize at  $10^7$  and three fully resist. Since *C.*  
132 *difficile* colonizes at  $10^7$  CFU/mL when it grows by itself in a reactor (data not shown), our  
133 data suggest that reactor communities that reached this level had no colonization  
134 resistance. Furthermore, 24 hrs after *C. difficile* challenge, those communities  
135 experienced a loss of resident taxa ( $37 \pm 21$  on day 6 to  $14 \pm 4$  on day 7; Wilcoxon Rank  
136 Sum Test,  $p < 0.01$ ), demonstrating that these microbial communities had both no ability  
137 to resist a non-indigenous microbe or remain intact (Fig. S3A-C).

138 Using Dirichlet Multinomial Modelling (DMM), we identified 3 community types  
139 across the established communities, which associated with dilution (Fig. 3B). Of these,

140 type 3 supported significantly lower colonization than enterotypes 1 and 2, with type 1  
141 supporting a middle level of colonization (Fig. 3C). Through LEfSe, we identified 19 taxa  
142 associated with the more resistant enterotypes (i.e., enterotypes 1 & 3; Fig. S3D) and five  
143 associated with enterotype 2 (Fig. S3E). We noted several commonly associated with  
144 metabolic functions known to increase resistance to *C. difficile*, such as short-chain fatty  
145 acid (SCFA) production. These taxa included *Bifidobacterium*, *Bacteroides*, *Blautia*,  
146 *Faecalibacterium*, Unclassified Lachnospiraceae and *Clostridium* (sensu stricto) (Fig. 3D  
147 & Fig. S3D-E).

148

### 149 **2.3. Diluted communities respond uniquely to a change in carbohydrate** 150 **concentrations**

151 The dilution experiments above indicated that colonization resistance against *C.*  
152 *difficile* was associated with the presence of taxa that could degrade dietary  
153 polysaccharides and produce SCFAs (20, 23). Other work has indicated that SCFAs are  
154 able to limit the growth of *C. difficile* (20). Therefore, we characterized how a change to  
155 higher carbohydrate concentrations affected the formation of communities and their ability  
156 to resist *C. difficile* colonization following a bottleneck event. We chose to increase the  
157 availability of the carbohydrate inulin due to its ability to induce the production of SCFAs  
158 by the gut microbiota (24-26). We also opted to use this polysaccharide due to the  
159 association of microbes with inulin catabolic potential and colonization resistance in the  
160 dilution experiment. Using a second fecal donor, we established reactor communities  
161 using feces diluted  $10^{-3}$ ,  $10^{-4}$ ,  $10^{-5}$  and  $10^{-6}$ . Based on our work above we hypothesized  
162 that these dilutions would result in communities that might support moderate levels of *C.*

163 *difficile* colonization. After growing communities for two days on standard BRM, which  
164 contains 0.02% inulin, we increased inulin concentrations to 0.2% (Fig. 4A). Despite the  
165 narrower range of dilution, communities established in these reactors again differed in the  
166 number of OTUs that became established, with less diluted communities having a  
167 significantly higher number of resident OTUs (Fig. 4B). While we observed a shift in the  
168 Bray-Curtis distance relative to baseline in the community diluted  $10^{-3}$  when comparing  
169 days 2 and 5, we did not observe a statistically significant change in the number of OTUs  
170 (Fig. 4B & Fig. S4A). There was no shift in ecologic distance in the other dilution groups.  
171 Despite the minimal changes in community structure, there was a significant shift in  
172 metabolic activity of these communities in terms of carbohydrate metabolism with a drop  
173 in acetate and a 3-fold increase in butyrate concentrations (Fig. 4C). There was no  
174 change in propionate concentrations (Fig. 4C). Interestingly, butyrate production prior to  
175 the shift in inulin (i.e., day 2) was predictive of concentrations afterward (i.e., day 7), with  
176 only communities diluted  $10^{-3}$  and  $10^{-4}$  responding to higher inulin (Fig. 4D & Fig. S4C).  
177 Despite this variation in metabolic output, pH did not differ across dilutions when  
178 measured at day 10 (Fig. S4B). Our data suggest that, in our bioreactor system, a 10-fold  
179 inulin increase altered the functional output of the community with minimal effect on its  
180 composition, with more diluted communities not responding to that change. Four days  
181 after challenging with  $10^5$  vegetative *C. difficile* cells, reactors colonized to an average  
182 density of  $10^6$  CFU/mL *C. difficile* in the  $10^{-5}$  and  $10^{-6}$  groups (Fig. 4E). While all reactors  
183 had low initial levels of *C. difficile* colonization, only the communities in the  $10^{-3}$  and  $10^{-4}$   
184 groups were able to ultimately prevent *C. difficile* invasion, suggesting that communities  
185 still able to respond to inulin also had the metabolic functions required to mediate



186 colonization resistance (Fig. 4E). While we observed a correlation between butyrate  
187 concentrations at day 0 and *C. difficile* colonization at day 4, butyrate did not affect *C.*  
188 *difficile* at the concentrations measured in our reactors in *in vitro* curves at pH 7 (Fig. S4D-  
189 F).

190

### 191 **3. Discussion**

192 The ability of an ecosystem to resist invasion by a non-indigenous species is tied  
193 to the diversity and temporal variability of community membership, an observation noted  
194 throughout the animal kingdom (27-30). Whether at the “macro” or “micro” levels of  
195 biology, environments provide a given set of nutrients to resident organisms, creating  
196 multi-dimensional niches comprised of biotic (e.g., nutrients, predators, etc.) and abiotic  
197 (eg., space, gas gradients, etc.) factors (31-36). The diversity and variability of a resident  
198 community determines how efficiently niches in the surrounding environment are utilized  
199 (36). In our study, we demonstrated that dilution of a community increases the variability  
200 of the established community, and those shifts are associated with *C. difficile* colonization  
201 resistance. However, this variability is only a marker of underlying metabolic interactions  
202 of colonization resistance as evidenced by an increase in resistance when we altered  
203 nutrient inputs into that environment.

204 These metabolic interactions manifest externally through greater competition with  
205 invaders as well as internally through limits placed on opportunistic taxa already present  
206 in that environment. Thus, we observed dilution having a two-fold disruptive effect on  
207 establishing communities, each tied to niche availability. First, while diversity is not strictly  
208 a metric of external stability, greater diversity allows for higher numbers of unique

209 interactions, both mutualistic and antagonistic, among community members (27, 37).  
210 These interactions increase the likelihood that spaces within a given niche become  
211 occupied through stronger cross-feeding interactions between resident members, which  
212 limits the invasion of foreign microbes (38-40). By removing rarer taxa, the stochastic  
213 nature of dilution weakened these interactions by destabilizing how the remaining  
214 microbes co-adapted to their new environment. The resulting changes decreased niche  
215 coverage by the resident microbiota (38). The resulting gaps reward microbes like *C.*  
216 *difficile*, which can adapt to use distinct niches depending on what is available in an  
217 environment (41). Additionally, networks of mutualistic and antagonistic interactions  
218 between microbes increase the likelihood of a microbial community's long-term survival  
219 (42). As observed in the communities that fully colonized with *C. difficile*, invasion by a  
220 foreign microbe triggered a collapse in the networks between resident organisms,  
221 resulting in their extinction (42).

222         Second, in addition to removing rarer taxa, dilution decreased the biomass of  
223 microbes starting off in each reactor. Since microbial abundance had recovered by the  
224 time of *C. difficile* challenge, we do not think that low microbial density played a direct role  
225 in the niches available to *C. difficile*. However, low microbial density left large open niches  
226 at the outset, which altered the early dynamics of community establishment. Microbes  
227 arrived in an environment absent of the competitors that previously had limited their  
228 expansion. This founder effect allowed opportunistic taxa within the resident community  
229 to take on outsized proportions due to their ability to use surrounding resources more  
230 efficiently (43, 44). Since the density of a seeding community regulates how they  
231 establish, it is inherently tied to how environmental niches become occupied (45). For

232 example, broad-spectrum antibiotic treatment induces significant gaps in niche coverage  
233 by reducing microbial abundance (46, 47). The downstream effects of these perturbations  
234 can linger for years, particularly if the event occurs early in the stages of microbial  
235 community development (e.g., in human infancy) (48). While perturbations that occur after  
236 a community reaches “maturity” have persistent effects, microbial communities tend to be  
237 impacted to a lesser extent (49, 50).

238         In our study, we also investigated the role of carbohydrates and microbial short-  
239 chain fatty acid metabolism in revealing the nature of altered community assembly  
240 affected by founder effects. While the metabolic nature of colonization resistance is  
241 multifactorial, several studies have characterized the role of SCFAs in limiting *C. difficile*  
242 establishment in the gut by altering the physiology of both microbe and host (23, 51, 52).  
243 While all SCFAs we measured can be products of inulin degradation, butyrate is relevant  
244 due to its toxicity to *C. difficile* as well as its ability to limit toxin-associated damage on the  
245 colonic epithelium (20, 51). While higher inulin concentrations induced an increase in  
246 butyrate, *C. difficile* tolerated those butyrate concentrations as measured by *in vitro*  
247 growth curves. Previous work suggests that SCFAs affect bacterial cells in a pH-  
248 dependent mechanism, with higher toxicity at lower pH due to the protonated acid form  
249 passing more easily through cellular membranes (53, 54). Our *in vitro* assays were  
250 balanced at pH 7, which limited toxicity that might be present in areas of the gut with lower  
251 pH and higher fermentative metabolic activity (32). Further research could disentangle  
252 the effects of butyrate on *C. difficile* physiology at unique pH levels (32).

253         Several studies have observed the presence of butyrogenic pathways in *C. difficile*,  
254 which may use butyrate as a terminal electron acceptor in the absence of other options,

255 such as Stickland amino acids (55-57). Due to unique toxicity patterns among the types  
256 of media used in our study as well as a previous study, we hypothesize that butyrate may  
257 have unique effects on *C. difficile* depending on which metabolic pathways are in use at  
258 the time of exposure (20, 58). This may be due in part to pressure from a build-up of  
259 downstream metabolic by-products as has been observed in *E. coli*'s response to high  
260 concentrations of acetate and formate (59). Further work is required to characterize the  
261 specific effects of SCFAs on *C. difficile* physiology and potential impacts on virulence  
262 (53). In summary, if butyrate is one of the mediators of increased colonization resistance  
263 in the inulin-treated communities, our data suggest that it is acting in concert with other  
264 unknown mechanisms.

265         Understanding the establishment of microbes in a new environment is essential as  
266 we seek to develop defined consortia to treat microbiota-related gut conditions, such as  
267 *C. difficile* infection. Some of the limited success of certain consortia may be due in part  
268 to low seeding densities as well as the inadequacy of smaller consortia to cover the  
269 appropriate niche spaces. Keeping these ecological dynamics in mind will assist in  
270 creating reliable treatments with broader efficacy across a population.

271

## 272 **4. Materials and Methods**

### 273 **4.1. Stool collection**

274         This study was approved by the University of Michigan's Institutional Review Board  
275 (IRB: HUM00141992). We recruited adults (age > 18) and who had no history of  
276 gastrointestinal disease, including IBD, IBS, Crohn's Disease and cancer. Individuals also  
277 had no history of antibiotic use or intestinal infection (bacterial or viral) in the previous six

278 months. Exclusion criteria included immunocompromised status and immunosuppressant  
279 use. Following informed consent, we provided enrolled subjects with a commode  
280 specimen collection hat, and conical tubes, and instructions to freeze the stool sample, if  
281 delivery and sample collection exceeded the given timeframe. Upon receipt of each  
282 sample, we compensated subjects, and stored the sample at  $-80^{\circ}\text{C}$  until use. For the  
283 experiments in this manuscript, we recruited two male individuals, aged 29 and 32.

284

#### 285 **4.2. Bioreactor set-up and operation**

286 Through a collaboration with Robert Britton (Baylor University, Houston, TX), we  
287 received three-dimensional designs for bioreactor strips, each containing six reactors  
288 (14). With these designs, Protolabs, Inc. (Maple Plain, MN) used stereolithography to  
289 create each bioreactor strip from a thermostable resin (Somos WaterShed XC 11122).  
290 The operation of these bioreactor arrays has been previously described (14). Briefly, we  
291 filled reactors with 15 mL of bioreactor media (BRM) prepared as previously described,  
292 except that we sterilized bovine bile (Sigma, St. Louis, MO) by filtering at  $0.22\ \mu\text{m}$  (14).  
293 Once we established continuous flow, multichannel Watson Marlow peristaltic pumps  
294 (Falmouth, UK) individually maintained media flow to each reactor (1 rpm, 0.89 mm bore  
295 tubing) at a rate of 0.13 mL/hr.

296

#### 297 **4.3. Bioreactor dilution experiment**

298 To prepare the fecal inoculum, we suspended fecal content from Subject A in  
299 sterile, pre-reduced phosphate-buffered saline (PBS; Thermo Fisher) at a ratio of 1:2.  
300 Feces were serially diluted by 10-fold to  $10^{-3}$ ,  $10^{-5}$ ,  $10^{-7}$ , and  $10^{-9}$  in sterile, pre-reduced

301 PBS and established in reactors in sextuplicate (N = 4 for 10<sup>-3</sup>). After 24 hrs of static  
302 culture, we initiated continuous flow and allowed to grow for 6 days before challenging  
303 with vegetative *Clostridioides difficile* str. 630 (Fig. 1A). Immediately before *C. difficile*  
304 challenge, we screened all reactors for possible contamination by plating on cycloserine-  
305 cefoxitin-fructose agar containing 0.1% taurocholate (TCCFA), which we made as  
306 previously described (60). To prepare *C. difficile* for challenge, we streaked spores onto  
307 agar plates containing taurocholate for 1 day at 37°C under anaerobic conditions. After  
308 incubation, we inoculated a *C. difficile* colony into 10 mL of sterile, pre-reduced BRM. At  
309 approximately 16 hrs of incubation, we back-diluted 1 mL of the culture in BRM by 10-fold  
310 and monitored to ensure *C. difficile* was in a log-phase of growth. Upon reaching OD 0.1,  
311 we again back-diluted the *C. difficile* culture in BRM and then inoculated into each reactor.  
312 We took 1 mL samples from the reactors at days 0 (i.e., the start of flow), 2, 3, 6, 7, 9 and  
313 10. We immediately pelleted cells, and transferred the supernatant to be stored  
314 separately at -80°C. To assess *C. difficile* colonization, we enumerated colony-forming  
315 units (CFU) by serial dilution and plating on TCCFA.

316

#### 317 **4.4. Bioreactor carbohydrate experiment**

318 To prepare the fecal inoculum, we suspended fecal content from Subject B in PBS  
319 as described above and then serially diluted to 10<sup>-3</sup>, 10<sup>-4</sup>, 10<sup>-5</sup> and 10<sup>-6</sup>. We established  
320 fecal dilutions into the bioreactors in triplicate. After 24 hrs of static culture, we established  
321 continuous flow using BRM (Fig. 4A). After 48 hrs of continuous flow, we switched source  
322 media for the reactors in each dilution group to BRM containing 10-fold higher inulin  
323 (Swanson, Fargo, ND) than standard BRM, increasing inulin concentrations from the

324 0.02% present in basal media to 0.2%. We held conditions for 5 days to give reactor  
325 communities time to establish before challenging with *C. difficile* on day 7 as described  
326 above. We took 1 mL samples at days 0, 2, 5, 6, 7, 8, 10 and 11. During sampling, we  
327 pelleted cells and transferred the supernatant to store at -80°C. We then resuspended  
328 the pellet in RNAProtect Bacteria Reagent (Qiagen, Germantown, MD). We measured pH  
329 on day 10 of the experiment using MColorpHast pH test strips (Sigma).

330

#### 331 **4.5. DNA extraction and 16S rRNA-gene sequencing**

332 We followed a detailed protocol for DNA extraction and Illumina MiSeq sequencing  
333 as described in previous publications with modifications (60). For the dilution bioreactor  
334 experiment, we pelleted cells and froze them at -80°C. In preparation for sequencing,  
335 cells were bead beaten in molecular grade water using 0.1 mm silica beads for 2 minutes.  
336 We then submitted cell extracts to the University of Michigan Microbiome Core for  
337 sequencing. For the carbohydrate bioreactor experiment, we pelleted cells and  
338 resuspended in Qiagen RNAProtect Bacteria Reagent before storing at -80°C. In  
339 preparation for sequencing, we submitted samples to the University of Michigan  
340 Microbiome Core for extraction using the Qiagen MagAttract PowerMicrobiome  
341 DNA/RNA Isolation Kit. For both experiments, we randomized samples into each  
342 extraction plate. To amplify the DNA, we used barcoded dual-index primers specific to  
343 the V4 region of the 16S rRNA-gene, and ran negative and positive controls in each  
344 sequencing plate (61). We prepared and sequenced libraries using the 500-cycle MiSeq  
345 V2 reagent kit (Illumina, San Diego, CA). Raw FASTQ files were deposited in the  
346 Sequence Read Archive (SRA) database (BioProject Accession: PRJNA837590).

347

#### 348 **4.6. Data processing and microbiota analysis**

349 We performed 16S rRNA-gene sequencing as previously described using the V4  
350 variable region and analyzed using mothur (62). Detailed methods, processed read data  
351 and the data analysis are described on GitHub  
352 ([https://github.com/mschnizlein/cdiff\\_foundereffects](https://github.com/mschnizlein/cdiff_foundereffects)). Briefly, after initial steps, such as  
353 assembly and quality control, we aligned contigs to the Silva v. 138 16S rRNA database  
354 (63). We removed chimeras using UCHIME and excluded samples with less than 1000  
355 sequences (64). We binned contigs into operational taxonomic units (OTUs) by 97%  
356 percent similarity using Opticlust and used the Silva rRNA sequence database to classify  
357 those sequences (63, 65). Alpha and beta diversity metrics were calculated from  
358 unfiltered OTU samples. After subsampling to 2000 sequences, we used Dirichlet  
359 Multinomial Modelling (DMM) to identify bacterial enterotypes based on genus-level  
360 classification and then used LEfSe to identify taxa that significantly associate with each  
361 of these community types (66, 67). We performed all statistical analyses in R (v. 4.1.1)  
362 using the following packages: ggplot2, reshape2, plyr, tidyverse, ComplexHeatmap, and  
363 scales (68-73).

364

#### 365 **4.7. 16S rRNA-gene qPCR**

366 Using dilutions of *Escherichia coli* ECOR2 genomic DNA as standards, we  
367 performed qPCR using PrimeTime gene expression master mix (IDT, Coralville, IA) and  
368 a set of broad-range 16S rRNA gene primers on a Thermo Fisher QuantStudio 3 (74).  
369 The DNA samples, standards, and negative controls were all amplified in triplicate. The



370 qPCR reaction conditions were as follows: 95°C for 3 min, followed by 40 cycles of two-  
371 step amplification at 95°C for 15 s and 60°C for 60 s. The quantification cycle (Cq) values  
372 for each reaction were determined by using the Thermo Fisher Cloud software, and  
373 sample DNA concentrations were determined by comparing Cq values to the standards  
374 in each plate.

375

#### 376 **4.8. *C. difficile* growth curves**

377 We isolated *C. difficile* strain 630g from a spore stock by growing overnight on BHI  
378 agar (BD) supplemented with 0.01% L-cysteine hydrochloride monohydrate (BHI; Sigma)  
379 and 0.1% taurocholate (Sigma). Growth curves were conducted with two biological  
380 replicates grown from two unique colonies. After growing overnight in BHI, we back-  
381 diluted cultures in fresh BHI with the overnight sample, and optical density was monitored  
382 to ensure cultures were in log-phase growth. Prior to the growth assay, we pelleted the  
383 culture, and then resuspended it in fresh 2x concentration BHI. We mixed this bacterial  
384 suspension into sodium butyrate solutions buffered at pH 7 with PBS ranging from 160mM  
385 to 2.5mM (2x final concentrations). The cultures were then placed in a 96-well plate optical  
386 density reader (Tecan, Switzerland) and monitored for 24 hours. All conditions were run  
387 with three technical replicates. Optical density measurements at 600 nm were  
388 automatically taken every 15 min, with 60 s of shaking immediately prior to measurement.  
389 We repeated this protocol in a follow-up experiment but substituted BHI for BRM in all  
390 steps following *C. difficile* colony isolation.

391

#### 392 **4.9. Short-chain fatty acid analysis**

393           100 uL of fecal supernatants were filtered using 0.22 micron 96-well filter plates  
394 and stored at -20°C until analysis. We transferred the filtrate to 1.5 mL screw cap vials  
395 with 100 uL inserts for high performance liquid chromatography (HPLC) analysis and then  
396 randomized them. We quantified acetate, propionate, and butyrate concentrations using  
397 a refractive index detector as part of a Shimadzu HPLC system (Shimadzu Scientific  
398 Instruments, Columbia, MD) as previously described (75). Briefly, we used a 0.01 N  
399 H<sub>2</sub>SO<sub>4</sub> mobile phase in filtered, Milli-Q water through an Aminex HPX87H column (Bio-  
400 Rad Laboratories, Hercules, CA). Sample areas under the curve were compared to  
401 volatile fatty acid standards with concentrations of 40, 20, 10, 5, 2.5, 1, 0.5, 0.25, and 0.1  
402 mM. Through blinded curation, we assessed baseline and peak quality and excluded poor  
403 quality data if necessary.

404

405

406

407 **References:**

- 408 1. Zmora N, Zilberman-Schapira G, Suez J, Mor U, Dori-Bachash M, Bashiardes S,  
409 Kotler E, Zur M, Regev-Lehavi D, Brik RB-Z, Federici S, Cohen Y, Linevsky R,  
410 Rothschild D, Moor AE, Ben-Moshe S, Harmelin A, Itzkovitz S, Maharshak N,  
411 Shibolet O, Shapiro H, Pevsner-Fischer M, Sharon I, Halpern Z, Segal E, Elinav  
412 E. 2018. Personalized gut mucosal colonization resistance to empiric probiotics is  
413 associated with unique host and microbiome features. *Cell* 174:1388-1405.e21.
- 414 2. Parlet CP, Brown MM, Horswill AR. 2019. Commensal staphylococci influence  
415 *Staphylococcus aureus* skin colonization and disease. *Trends Microbiol* 27:497-  
416 507.
- 417 3. Crouzet L, Rigottier-Gois L, Serror P. 2015. Potential use of probiotic and  
418 commensal bacteria as non-antibiotic strategies against vancomycin-resistant  
419 enterococci. *FEMS Microbiol Letters* 362:fnv012.
- 420 4. Ducarmon QR, Zwittink RD, Hornung BVH, van Schaik W, Young VB, Kuijper EJ.  
421 2019. Gut microbiota and colonization resistance against bacterial enteric  
422 infection. *Microbiol Mol Biol Rev* 83.
- 423 5. Aranda-Díaz A, Ng KM, Thomsen T, Real-Ramírez I, Dahan D, Dittmar S,  
424 Gonzalez CG, Chavez T, Vasquez KS, Nguyen TH, Yu FB, Higginbottom SK, Neff  
425 NF, Elias JE, Sonnenburg JL, Huang KC. 2022. Establishment and  
426 characterization of stable, diverse, fecal-derived in vitro microbial communities that  
427 model the intestinal microbiota. *Cell Host Microbe* 30:260-272.e5.
- 428 6. Chilton CH, Crowther GS, Baines SD, Todhunter SL, Freeman J, Locher HH,  
429 Athanasiou A, Wilcox MH. 2014. *In vitro* activity of cadazolid against clinically  
430 relevant *Clostridium difficile* isolates and in an in vitro gut model of *C. difficile*  
431 infection. *J Antimicrob Chemother* 69:697-705.
- 432 7. Davies M, Galazzo G, van Hattem JM, Arcilla MS, Melles DC, de Jong MD,  
433 Schultsz C, Wolffs P, McNally A, Schaik WV, Penders J. 2022. Enterobacteriaceae  
434 and Bacteroidaceae provide resistance to travel-associated intestinal colonization  
435 by multi-drug resistant *Escherichia coli*. *Gut Microbes* 14:2060676.
- 436 8. Li Q, Chen S, Zhu K, Huang X, Huang Y, Shen Z, Ding S, Gu D, Yang Q, Sun H,  
437 Hu F, Wang H, Cai J, Ma B, Zhang R, Shen J. 2022. Collateral sensitivity to  
438 pleuromutilins in vancomycin-resistant *Enterococcus faecium*. *Nat Commun*  
439 13:1888.
- 440 9. Pérez Escriva P, Fuhrer T, Sauer U. 2022. Distinct N and C cross-feeding networks  
441 in a synthetic mouse gut consortium. *mSystems* doi:10.1128/msystems.01484-  
442 21:e0148421.
- 443 10. Reed AD, Fletcher JR, Huang YY, Thanissery R, Rivera AJ, Parsons RJ, Stewart  
444 AK, Kountz DJ, Shen A, Balskus EP, Theriot CM. 2022. The stickland reaction  
445 precursor *trans*-4-hydroxy-l-proline differentially impacts the metabolism of  
446 *Clostridioides difficile* and commensal clostridia. *mSphere*  
447 doi:10.1128/msphere.00926-21:e0092621.
- 448 11. Rajan A, Robertson MJ, Carter HE, Poole NM, Clark JR, Green SI, Criss ZK, Zhao  
449 B, Karandikar U, Xing Y, Margalef-Català M, Jain N, Wilson RL, Bai F, Hyser JM,  
450 Petrosino J, Shroyer NF, Blutt SE, Coarfa C, Song X, Prasad BV, Amieva MR,  
451 Grande-Allen J, Estes MK, Okhuysen PC, Maresso AW. 2020. Enteroaggregative

- 452 E. coli Adherence to Human Heparan Sulfate Proteoglycans Drives Segment and  
453 Host Specific Responses to Infection. PLOS Pathogens 16:e1008851.
- 454 12. Engevik MA, Danhof HA, Shrestha R, Chang-Graham AL, Hyser JM, Haag AM,  
455 Mohammad MA, Britton RA, Versalovic J, Sorg JA, Spinler JK. 2020. Reuterin  
456 disrupts *Clostridioides difficile* metabolism and pathogenicity through reactive  
457 oxygen species generation. Gut Microbes 12:1788898.
- 458 13. Gonyar LA, Smith RM, Giron JA, Zachos NC, Ruiz-Perez F, Nataro JP. 2020.  
459 Aggregative adherence fimbriae II of enteroaggregative *Escherichia coli* are  
460 required for adherence and barrier disruption during infection of human colonoids.  
461 Infect Immun 88.
- 462 14. Auchtung JM, Robinson CD, Farrell K, Britton RA. 2016. MiniBioReactor Arrays  
463 (MBRAs) as a tool for studying *C. difficile* physiology in the presence of a complex  
464 community. Methods Mol Biol 1476:235-58.
- 465 15. Freeman J, O'Neill FJ, Wilcox MH. 2003. Effects of cefotaxime and  
466 desacetylcefotaxime upon *Clostridium difficile* proliferation and toxin production in  
467 a triple-stage chemostat model of the human gut. J Antimicrob Chemother 52.
- 468 16. Freeman J, Baines SD, Jabes D, Wilcox MH. 2005. Comparison of the efficacy of  
469 ramoplanin and vancomycin in both *in vitro* and *in vivo* models of clindamycin-  
470 induced *Clostridium difficile* infection. J Antimicrob Chemother 56:717-25.
- 471 17. Baines SD, Freeman J, Wilcox MH. 2005. Effects of piperacillin/tazobactam on  
472 *Clostridium difficile* growth and toxin production in a human gut model. J  
473 Antimicrob Chemother 55:974-82.
- 474 18. Zackular JP, Moore JL, Jordan AT, Juttukonda LJ, Noto MJ, Nicholson MR, Crews  
475 JD, Semler MW, Zhang Y, Ware LB, Washington MK, Chazin WJ, Caprioli RM,  
476 Skaar EP. 2016. Dietary zinc alters the microbiota and decreases resistance to  
477 *Clostridium difficile* infection. Nat Med 22:1330-1334.
- 478 19. Ward P, P. Young G. 1997. Dynamics of *Clostridium difficile* infection: Control  
479 using diet, vol 412.
- 480 20. Hryckowian AJ, Van Treuren W, Smits SA, Davis NM, Gardner JO, Bouley DM,  
481 Sonnenburg JL. 2018. Microbiota-accessible carbohydrates suppress *Clostridium*  
482 *difficile* infection in a murine model. Nat Microbiol 3:662-669.
- 483 21. Auchtung JM, Robinson CD, Britton RA. 2015. Cultivation of stable, reproducible  
484 microbial communities from different fecal donors using minibioreactor arrays  
485 (MBRAs). Microbiome 3:42.
- 486 22. Auchtung JM, Preisner EC, Collins J, Lerma AI, Britton RA, Young VB. 2020.  
487 Identification of simplified microbial communities that inhibit *Clostridioides difficile*  
488 infection through dilution/extinction. mSphere 5:e00387-20.
- 489 23. Seekatz AM, Theriot CM, Rao K, Chang Y-M, Freeman AE, Kao JY, Young VB.  
490 2018. Restoration of short chain fatty acid and bile acid metabolism following fecal  
491 microbiota transplantation in patients with recurrent *Clostridium difficile* infection.  
492 Anaerobe doi:10.1016/j.anaerobe.2018.04.001.
- 493 24. Yang J, Martínez I, Walter J, Keshavarzian A, Rose DJ. 2013. *In vitro*  
494 characterization of the impact of selected dietary fibers on fecal microbiota  
495 composition and short chain fatty acid production. Anaerobe 23:74-81.

- 496 25. Van den Abbeele P, Venema K, Van de Wiele T, Verstraete W, Possemiers S.  
497 2013. Different human gut models reveal the distinct fermentation patterns of  
498 arabinoxylan versus inulin. *J Agric Food Chem* 61:9819-27.
- 499 26. Valcheva R, Koleva P, Martínez I, Walter J, Gänzle MG, Dieleman LA. 2019. Inulin-  
500 type fructans improve active ulcerative colitis associated with microbiota changes  
501 and increased short-chain fatty acids levels. *Gut Microbes* 10:334-357.
- 502 27. Qian JJ, Akçay E. 2020. The balance of interaction types determines the assembly  
503 and stability of ecological communities. *Nat Ecol Evol* 4:356-365.
- 504 28. Song C, Uricchio LH, Mordecai EA, Saavedra S. 2021. Understanding the  
505 emergence of contingent and deterministic exclusion in multispecies communities.  
506 *Ecol Lett* 24:2155-2168.
- 507 29. Morris JR, Allhoff KT, Valdovinos FS. 2021. Strange invaders increase disturbance  
508 and promote generalists in an evolving food web. *Sci Rep* 11:21274.
- 509 30. Wang C, Cheng H, Wang S, Wei M, Du D. 2021. Plant community and the  
510 influence of plant taxonomic diversity on community stability and invasibility: A  
511 case study based on *Solidago canadensis* L. *Sci Total Environ* 768:144518.
- 512 31. Konjar Š, Pavšič M, Veldhoen M. 2021. Regulation of oxygen homeostasis at the  
513 intestinal epithelial barrier site. *Int J Mol Sci* 22.
- 514 32. Wetzel D, McBride SM. 2020. The impact of pH on *Clostridioides difficile*  
515 sporulation and physiology. *Appl Environ Microbiol* 86.
- 516 33. Djemai K, Drancourt M, Tidjani Alou M. 2021. Bacteria and methanogens in the  
517 human microbiome: A review of syntrophic interactions. *Microb Ecol*  
518 doi:10.1007/s00248-021-01796-7.
- 519 34. Pereira FC, Berry D. 2017. Microbial nutrient niches in the gut. *Environ Microbiol*  
520 19:1366-1378.
- 521 35. Bono LM, Draghi JA, Turner PE. 2020. Evolvability costs of niche expansion.  
522 *Trends Genet* 36:14-23.
- 523 36. Baquero F, Coque TM, Galán JC, Martínez JL. 2021. The origin of niches and  
524 species in the bacterial world. *Frontiers in Microbiology* 12.
- 525 37. Vila JCC, Jones ML, Patel M, Bell T, Rosindell J. 2019. Uncovering the rules of  
526 microbial community invasions. *Nature Ecology & Evolution* 3:1162-1171.
- 527 38. Badali M, Zilman A. 2020. Effects of niche overlap on coexistence, fixation and  
528 invasion in a population of two interacting species. *R Soc Open Sci* 7:192181.
- 529 39. Herren CM. 2020. Disruption of cross-feeding interactions by invading taxa can  
530 cause invasional meltdown in microbial communities. *Proc Biol Sci* 287:20192945.
- 531 40. Diaz-Colunga J, Lu N, Sanchez-Gorostiaga A, Chang CY, Cai HS, Goldford JE,  
532 Tikhonov M, Sánchez Á. 2022. Top-down and bottom-up cohesiveness in  
533 microbial community coalescence. *Proc Natl Acad Sci USA* 119.
- 534 41. Jenior ML, Leslie JL, Young VB, Schloss PD. 2017. *Clostridium difficile* colonizes  
535 alternative nutrient niches during infection across distinct murine gut microbiomes.  
536 *mSystems* 2.
- 537 42. Bascompte J, Stouffer DB. 2009. The assembly and disassembly of ecological  
538 networks. *Philosophical Transactions of the Royal Society B: Biological Sciences*  
539 364:1781-1787.
- 540 43. Brown SP, Cornforth DM, Mideo N. 2012. Evolution of virulence in opportunistic  
541 pathogens: generalism, plasticity, and control. *Trends Microbiol* 20:336-342.

- 542 44. Sheppard SK. 2022. Strain wars and the evolution of opportunistic pathogens.  
543 Current Opinion in Microbiology 67:102138.
- 544 45. Waters JM, Fraser CI, Hewitt GM. 2013. Founder takes all: Density-dependent  
545 processes structure biodiversity. Trends in Ecology & Evolution 28:78-85.
- 546 46. Dethlefsen L, Relman DA. 2011. Incomplete recovery and individualized  
547 responses of the human distal gut microbiota to repeated antibiotic perturbation.  
548 Proc Natl Acad Sci USA 108 Suppl 1:4554-61.
- 549 47. Schubert AM, Sinani H, Schloss PD. 2015. Antibiotic-induced alterations of the  
550 murine gut microbiota and subsequent effects on colonization resistance against  
551 *Clostridium difficile*. mBio 6:e00974-15.
- 552 48. Korpela K, Salonen A, Virta LJ, Kekkonen RA, Forslund K, Bork P, de Vos WM.  
553 2016. Intestinal microbiome is related to lifetime antibiotic use in Finnish pre-school  
554 children. Nat Commun 7:10410.
- 555 49. Dethlefsen L, Huse S, Sogin ML, Relman DA. 2008. The pervasive effects of an  
556 antibiotic on the human gut microbiota, as revealed by deep 16S rRNA  
557 sequencing. PLOS Biology 6:e280.
- 558 50. Jernberg C, Löfmark S, Edlund C, Jansson JK. 2007. Long-term ecological  
559 impacts of antibiotic administration on the human intestinal microbiota. ISME J  
560 1:56-66.
- 561 51. Fachi JL, Felipe JdS, Pral LP, da Silva BK, Corrêa RO, de Andrade MCP, da  
562 Fonseca DM, Basso PJ, Câmara NOS, de Sales e Souza ÉL, dos Santos Martins  
563 F, Guima SES, Thomas AM, Setubal JC, Magalhães YT, Forti FL, Candreva T,  
564 Rodrigues HG, de Jesus MB, Consonni SR, Farias AdS, Varga-Weisz P, Vinolo  
565 MAR. 2019. Butyrate protects mice from *Clostridium difficile*-induced colitis  
566 through an HIF-1-dependent mechanism. Cell Reports 27:750-761.e7.
- 567 52. Gregory AL, Pensinger DA, Hryckowian AJ. 2021. A short chain fatty acid-centric  
568 view of *Clostridioides difficile* pathogenesis. PLOS Pathogens 17:e1009959.
- 569 53. Sun Y, O'Riordan MXD. 2013. Regulation of bacterial pathogenesis by intestinal  
570 short-chain fatty acids. Advances in Applied Microbiology 85:93-118.
- 571 54. Cherrington CA, Hinton M, Mead GC, Chopra I. 1991. Organic acids: Chemistry,  
572 antibacterial activity and practical applications, p 87-108. In Rose AH, Tempest  
573 DW (ed), Advances in Microbial Physiology, vol 32. Academic Press.
- 574 55. Mullany P, Clayton CL, Pallen MJ, Slone R, al-Saleh A, Tabaqchali S. 1994. Genes  
575 encoding homologues of three consecutive enzymes in the butyrate/butanol-  
576 producing pathway of *Clostridium acetobutylicum* are clustered on the *Clostridium*  
577 *difficile* chromosome. FEMS Microbiol Letters 124:61-7.
- 578 56. Abounaga el H, Pinkenburg O, Schiffels J, El-Refai A, Buckel W, Selmer T. 2013.  
579 Effect of an oxygen-tolerant bifurcating butyryl coenzyme A  
580 dehydrogenase/electron-transferring flavoprotein complex from *Clostridium*  
581 *difficile* on butyrate production in *Escherichia coli*. J Bacteriol 195:3704-13.
- 582 57. Gencic S, Grahame DA. 2020. Diverse energy-conserving pathways in *Clostridium*  
583 *difficile*: Growth in the absence of amino acid Stickland acceptors and the role of  
584 the Wood-Ljungdahl Pathway. J Bacteriol 202.
- 585 58. Karasawa T, Ikoma S, Yamakawa K, Nakamura S. 1995. A defined growth medium  
586 for *Clostridium difficile*. Microbiology 141:371-375.

- 587 59. Kirkpatrick C, Maurer LM, Oyelakin NE, Yoncheva YN, Maurer R, Slonczewski JL.  
588 2001. Acetate and formate stress: Opposite responses in the proteome of  
589 *Escherichia coli*. J of Bacteriology 183:6466-6477.
- 590 60. Leslie JL, Vendrov KC, Jenior ML, Young VB. 2019. The gut microbiota is  
591 associated with clearance of *Clostridium difficile* infection independent of adaptive  
592 immunity. mSphere 4:e00698-18.
- 593 61. Kozich JJ, Westcott SL, Baxter NT, Highlander SK, Schloss PD. 2013.  
594 Development of a dual-index sequencing strategy and curation pipeline for  
595 analyzing amplicon sequence data on the MiSeq Illumina sequencing platform.  
596 Appl Environ Microbiol 79.
- 597 62. Schloss PD, Westcott SL, Ryabin T, Hall JR, Hartmann M, Hollister EB, Lesniewski  
598 RA, Oakley BB, Parks DH, Robinson CJ, Sahl JW, Stres B, Thallinger GG, Van  
599 Horn DJ, Weber CF. 2009. Introducing mothur: Open-source, platform-  
600 independent, community-supported software for describing and comparing  
601 microbial communities. Appl Environ Microbiol 75:7537-41.
- 602 63. Pruesse E, Quast C, Knittel K, Fuchs BM, Ludwig W, Peplies J, Glockner FO.  
603 2007. SILVA: a comprehensive online resource for quality checked and aligned  
604 ribosomal RNA sequence data compatible with ARB. Nucleic Acids Res 35:7188-  
605 96.
- 606 64. Edgar RC, Haas BJ, Clemente JC, Quince C, Knight R. 2011. UCHIME improves  
607 sensitivity and speed of chimera detection. Bioinformatics 27:2194-200.
- 608 65. Westcott SL, Schloss PD. 2017. OptiClust, an improved method for assigning  
609 amplicon-based sequence data to operational taxonomic units. mSphere 2.
- 610 66. Holmes I, Harris K, Quince C. 2012. Dirichlet multinomial mixtures: Generative  
611 models for microbial metagenomics. PLOS ONE 7:e30126.
- 612 67. Segata N, Izard J, Waldron L, Gevers D, Miropolsky L, Garrett WS, Huttenhower  
613 C. 2011. Metagenomic biomarker discovery and explanation. Genome Biology  
614 12:R60-R60.
- 615 68. Team RC. 2013. R: A language and environment for statistical computing. R  
616 Foundation for Statistical Computing.
- 617 69. Wickham H. 2016. ggplot2: Elegant graphics for data analysis. Springer-Verlag,  
618 New York.
- 619 70. Wickham H. 2007. Reshaping data with the reshape package. J of Statistical  
620 Software 21:1 - 20.
- 621 71. Wickham H. 2011. The split-apply-combine strategy for data analysis. J of  
622 Statistical Software 40:1 - 29.
- 623 72. Wickham H, Averick M, Bryan J, Chang W, McGowan LDA, François R,  
624 Golemund G, Hayes A, Henry L, Hester J, Kuhn M, Pedersen TL, Miller E, Bache  
625 SM, Müller K, Ooms J, Robinson D, Seidel DP, Spinu V, Takahashi K, Vaughan  
626 D, Wilke C, Woo K, Yutani H. 2019. Welcome to the Tidyverse. J of Open Source  
627 Software 4.
- 628 73. Gu Z, Eils R, Schlesner M. 2016. Complex heatmaps reveal patterns and  
629 correlations in multidimensional genomic data. Bioinformatics 32:2847-9.
- 630 74. Nadkarni MA, Martin FE, Jacques NA, Hunter N. 2002. Determination of bacterial  
631 load by real-time PCR using a broad-range (universal) probe and primers set.  
632 Microbiology 148:257-266.

633 75. Baxter NT, Schmidt AW, Venkataraman A, Kim KS, Waldron C, Schmidt TM. 2019.  
634 Dynamics of human gut microbiota and short-chain fatty acids in response to  
635 dietary interventions with three fermentable fibers. *mBio* 10:e02566-18.  
636 -

637

638

639



640 **Figure 1: Establishment dynamics of diluted microbial communities. A)**  
641 Experimental timeline of the bioreactor dilution experiment. **B)** Observed species (SOBS)  
642 is plotted by dilution from day 0 to the day of *C. difficile* challenge. **C)** Principal coordinate  
643 analysis of all timepoints in each community dilution (ellipses represent the 95%  
644 confidence interval of a multivariate t-distribution for datapoints in each dilution). **D-G)**  
645 Averaged relative abundance at each indicated timepoint for the communities diluted **D)**  
646  $10^{-3}$ , **E)**  $10^{-5}$ , **F)**  $10^{-7}$ , and **G)**  $10^{-9}$ . Taxa are color coded and ordered by phylum  
647 (Bacteroidota = green, Bacillota = blue/purple, Actinomycetota = orange,  
648 Pseudomonadota = red and Verrucomicrobiota = yellow. Other phyla, low abundance  
649 taxa and unclassified bacteria are colored as grey).

650  
651 **Figure 2: Intra-group community variability by dilution.** Intra-group  $\beta$ -diversity was  
652 compared across samples for each of the four community dilution groups using the **A)**  
653 Bray-Curtis Dissimilarity Index and the **B)** Jaccard Dissimilarity Index (statistical analysis:  
654 one-way ANOVA).

655  
656 **Figure 3: Associations between *C. difficile* colonization and microbiota community**  
657 **type. A)** *C. difficile* colonization on each day following challenge measured in CFU/mL  
658 (dashed line = limit of detection). **B)** All samples were categorized into three unique  
659 community types by Dirichlet Multinomial Modelling (DMM). Their relative abundance in  
660 each dilution group is plotted with the total number of samples in each dilution listed on  
661 the x-axis (statistical analysis: Fisher's Exact Test). **C)** *C. difficile* abundance in each  
662 sample is compared to that samples associated community type (statistical analysis:  
663 Wilcoxon Rank Sum Test, \* indicates  $p < 0.01$ ). **D)** Average relative abundance of  
664 bacterial taxa in each community type (Peptostreptococcales is abbreviated as Peptostr.;  
665 Bacteroidota = green, Bacillota = blue/purple, Actinomycetota = orange,  
666 Pseudomonadota = red, Verrucomicrobiota = yellow and Desulfovibrio = grey. Other  
667 phyla, low abundance taxa and unclassified bacteria are colored as black).

668  
669 **Figure 4: Effect of inulin on microbial community function. A)** Experimental timeline  
670 of the bioreactor carbohydrate experiment. **B)** Observed species (SOBS) over time  
671 colored by dilution group (statistical analysis: Kruskal-Wallis Test comparing SOBS at all  
672 timepoints with dilution group,  $p < 0.01$ ; Wilcoxon Rank Sum Test comparing OTUs in  
673 each group at day 2 and day 5,  $p =$  not significant). **C)** Short chain fatty acid  
674 concentrations in the 0.2% inulin group as measured by HPLC from day 2 (pre-media  
675 switch) and day 7 (5 days post-media switch; Ac = acetate, Pr = propionate, Bu = butyrate;  
676 statistical analysis: Wilcoxon Rank Sum Test, \* indicates  $p < 0.01$  and a indicates  $p =$   
677 0.033). **D)** Butyrate response 3 and 5 days following the shift to higher inulin, with  
678 communities being colored by dilution (statistical analysis: at day 7,  $10^{-3}$  and  $10^{-4}$   
679 compared to  $10^{-5}$  and  $10^{-6}$  using the Wilcoxon Rank Sum Test, \* indicates  $p < 0.01$ ). **E)**  
680 *C. difficile* colonization in the reactors treated with 0.2% inulin, colored by community  
681 dilution (dashed line = limit of detection).

682  
683 **Figure S1: Individualized establishment dynamics of diluted microbial**  
684 **communities. A)** Observed species (SOBS) from all timepoints are plotted by community  
685 dilution. **B)** 16S rRNA-gene copies on days 0 and 6 are plotted by dilution. **C-F)** Relative

686 abundance of 16S rRNA gene sequences is plotted for each individual reactor in the  
687 communities diluted **C)**  $10^{-3}$ , **D)**  $10^{-5}$ , **E)**  $10^{-7}$ , and **F)**  $10^{-9}$  (Bacteroidota = green, Firmicutes  
688 = blue/purple, Actinobacteriota = orange, Proteobacteriota = red and Verrucomicrobiota  
689 = yellow. Other phyla, low abundance taxa and unclassified bacteria are colored as grey).

690  
691 **Figure S2: Intra-reactor community variability by dilution.** Intra-reactor  $\beta$ -diversity  
692 was compared across samples within each reactor for the four community dilution groups  
693 using the **A)** Bray-Curtis Dissimilarity Index and the **B)** Jaccard Dissimilarity Index  
694 (statistical analysis: one-way ANOVA).

695  
696 **Figure S3: Associations between *C. difficile* and resident microbes.** **A)** Observed  
697 species (SOBS) in each community dilution following *C. difficile* challenge. *C. difficile*  
698 abundance compared to the SOBS on **B)** day 6 and **C)** day 7 (statistical analysis: linear  
699 regression). LEfSe analysis comparing bacterial taxa in community types 1 & 3 with those  
700 in type 2. Certain taxa were more abundant in **D)** types 1 & 3 and others in **E)** type 2.

701  
702 **Figure S4: Effects of inulin on microbial community function.** **A)** Bray-Curtis  
703 Dissimilarity index of communities in the 0.2% inulin treated reactor groups colored by  
704 dilution. Each point represents the distance of each reactor community relative to its  
705 baseline at day 0 (statistical analysis: Wilcoxon Rank Sum Test comparing distance to  
706 baseline at day 2 and day 5; for  $10^{-3}$ ,  $p = 0.016$ ; for  $10^{-4}$ ,  $10^{-5}$  and  $10^{-6}$ ,  $p =$  not significant).  
707 **B)** pH of each reactor by dilution group at day 10 (statistical test: Kruskal-Wallis test). **C)**  
708 Butyrate concentrations at day 2 (pre-inulin shift) compared to concentrations at day 7  
709 (statistical analysis: linear regression). **D)** Butyrate concentrations at day 7 compared to  
710 *C. difficile* colonization on day 11. *C. difficile* growth curves in assessing butyrate toxicity  
711 in **E)** BHI and **F)** BRM, each buffered at pH 7.

712  
713

714 **Acknowledgements:** We would like to thank the Microbial Systems and Molecular  
715 Biology Core at the University of Michigan for their work performing the DNA extractions  
716 and 16S rRNA-gene sequencing. Many thanks go to Deanna Montgomery for critical  
717 review of this manuscript. We would also like to thank Thomas Schmidt and Kwi Kim for  
718 their guidance performing the HPLC short chain fatty acid analysis. Finally, we thank  
719 members of the Robert Britton lab for assistance as we got the bioreactor model running  
720 in the lab. This work was funded by the National Institutes for Allergy and Infectious  
721 Disease (U01-AI124255) and for Diabetes and Digestive and Kidney Diseases (T32-  
722 DK094775).

723

724 **Contributions:**

725 M.K.S.: Conceptualization, data curation, formal analysis, investigation, methodology,  
726 project administration, visualization, writing (original draft), writing (review & editing)

727 A.K.S.: investigation, methodology, writing (review & editing)

728 M.J.G.: investigation, formal analysis, visualization, writing (review & editing)

729 S.J.E.: investigation, formal analysis, writing (review & editing)

730 V.B.Y.: Conceptualization, funding acquisition, project administration, resources,  
731 supervision, writing (original draft), writing (review & editing)

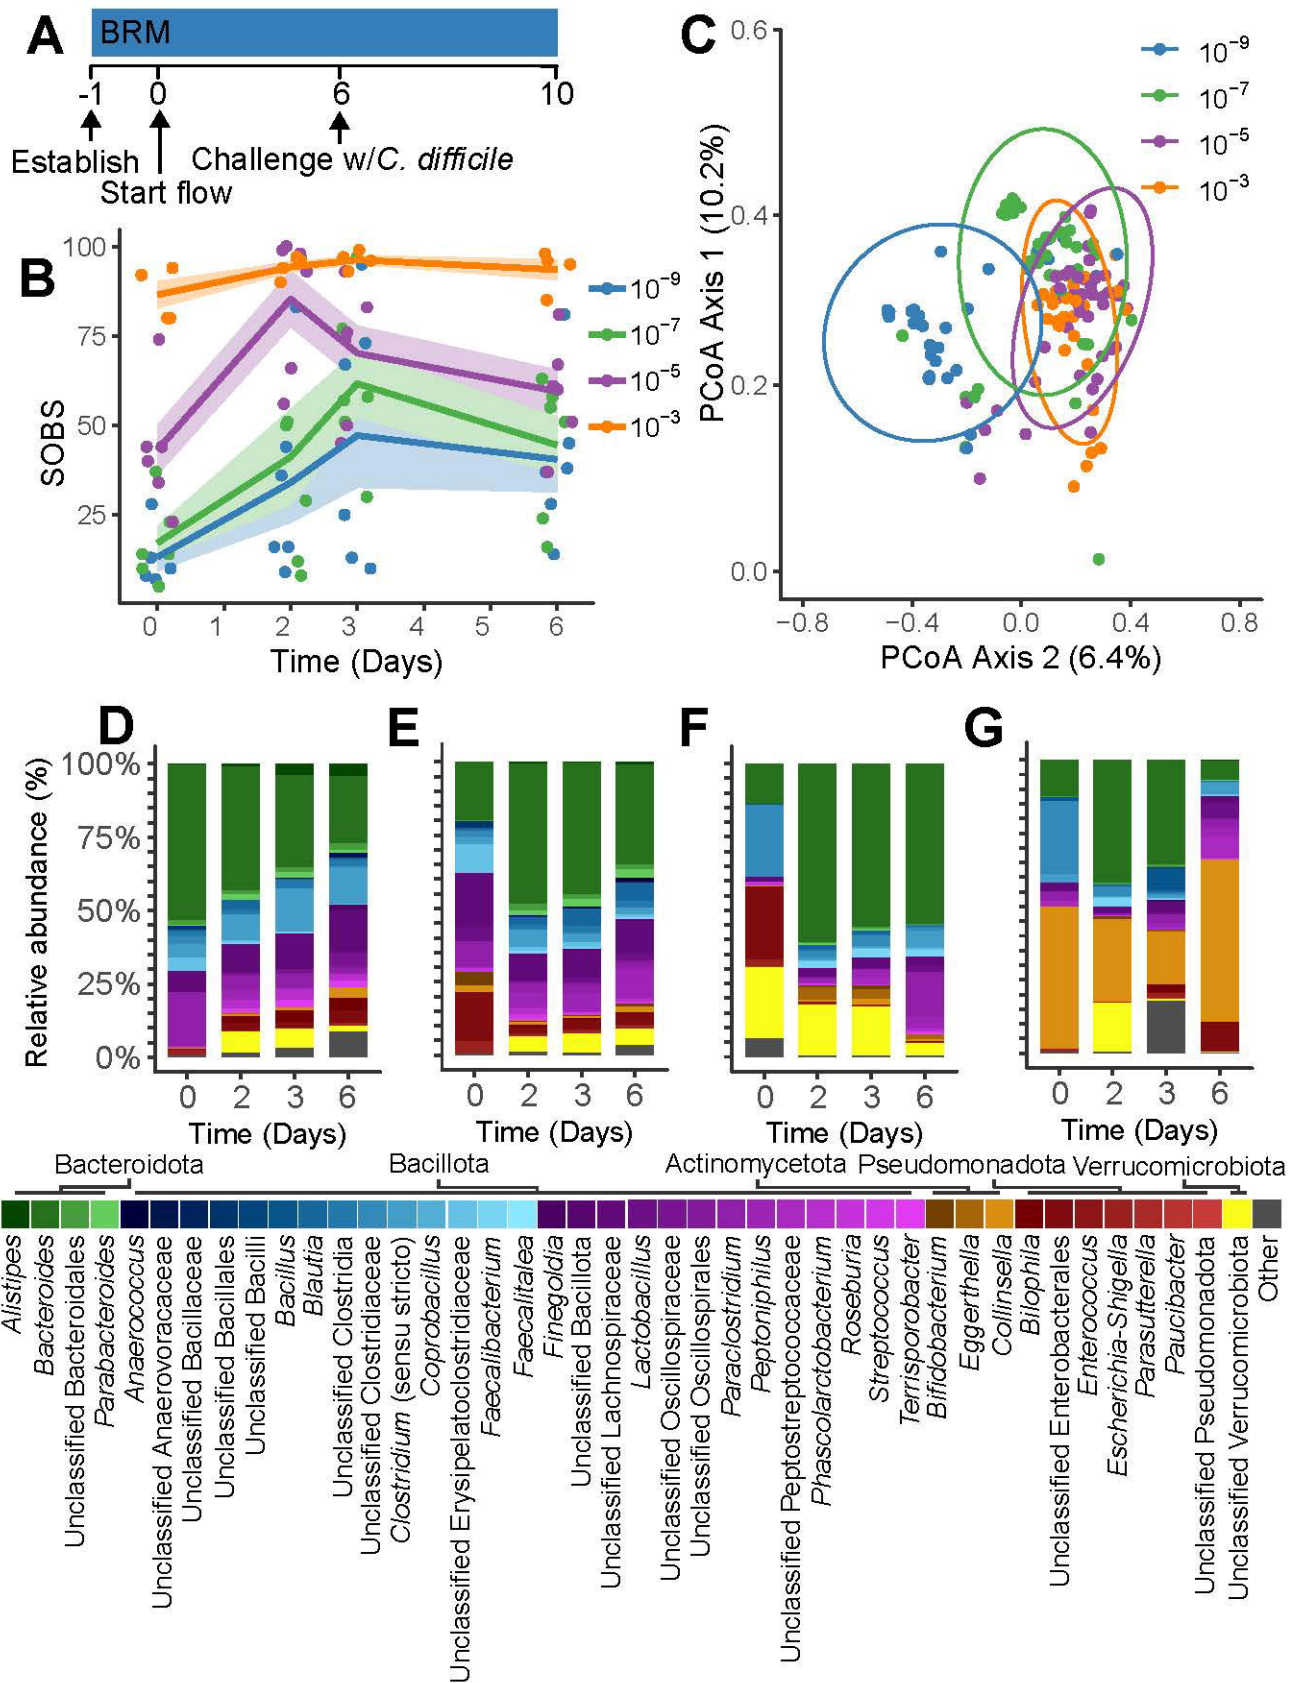

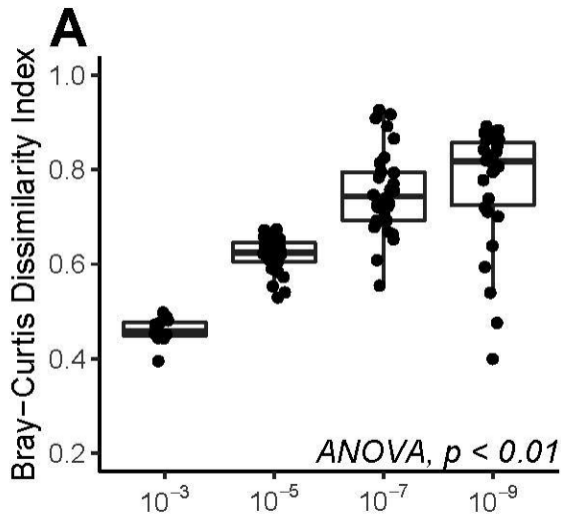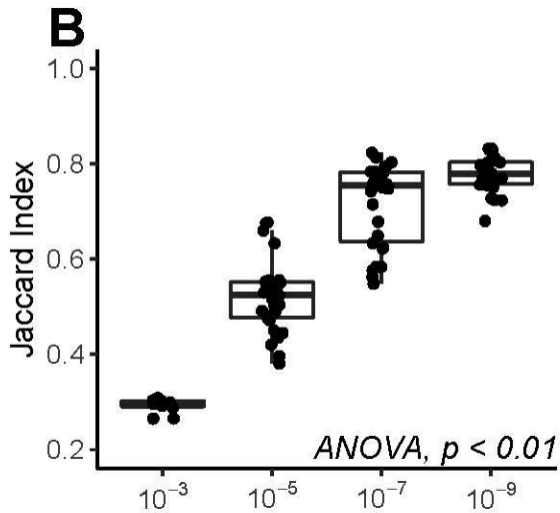

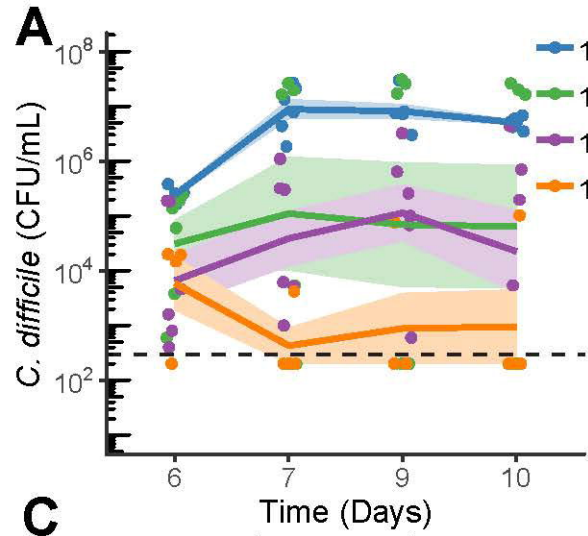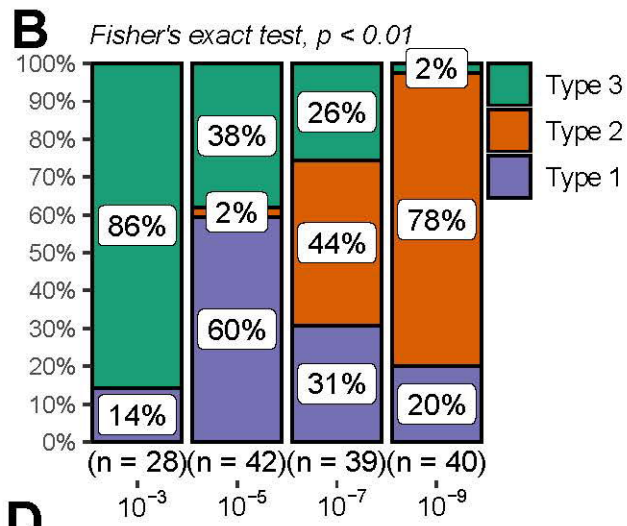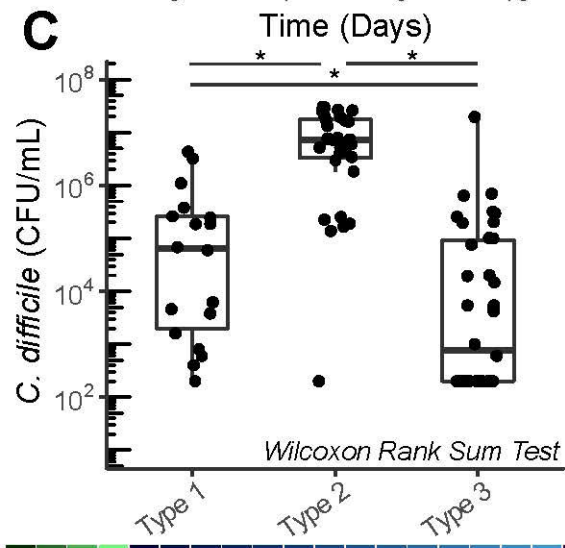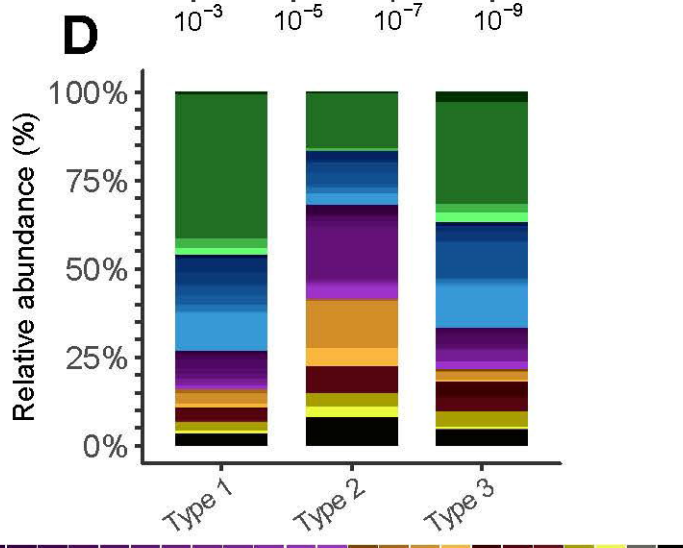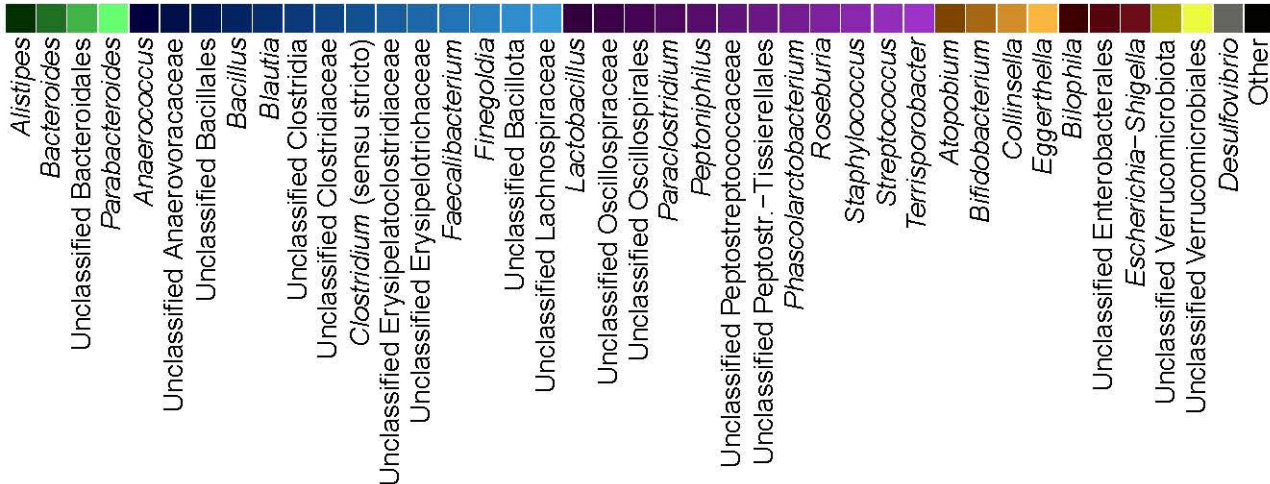

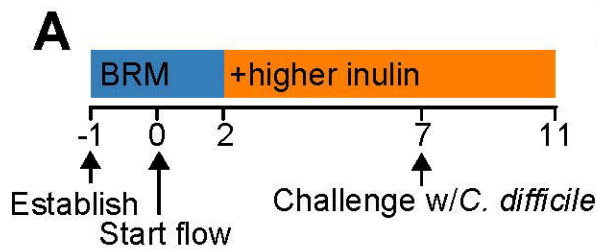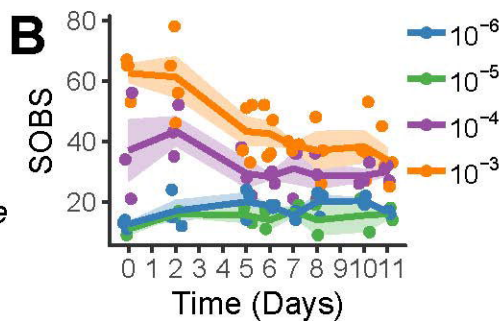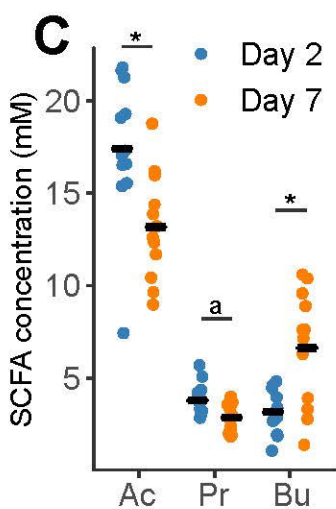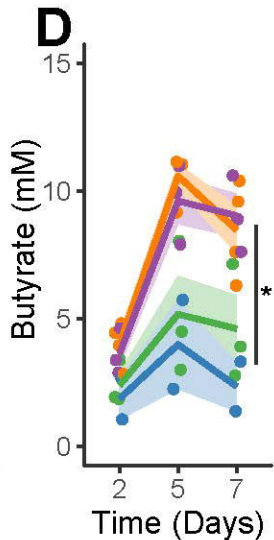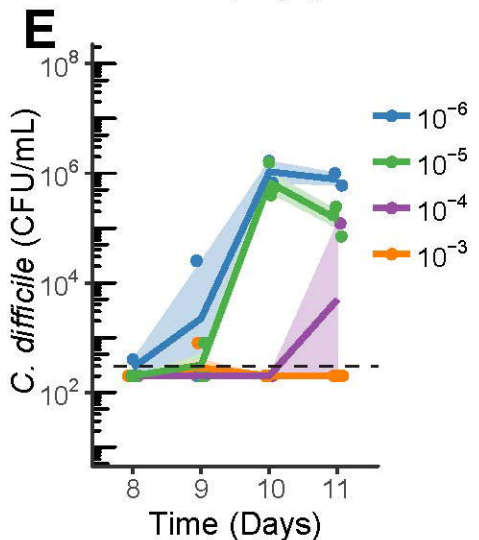

Source: https://www.biorxiv.org/content/10.1101/2022.05.20.492827v1.full.pdf
